# Supplementary material
Source: Research Square preprint supplement (doi:10.21203/rs.3.rs-9093904/v1)
Supplement: Supplementary file 1 [file 0a96b3456c5c53705a652bc4.pdf]

#### S4. Interest List Definition

We defined an interest set of 19 bacterial families commonly reported in equine hindgut microbiota literature when we evaluated effect on DNA extraction kit on microbiota profiles.

Kommentert [AK1]: Noen referanser?
