# Supplementary material
Source: Research Square preprint supplement (doi:10.21203/rs.3.rs-9093904/v1)
Supplement: Supplementary file 3 [file 80cfcd3ab5cff023267e1506.docx]

S4. Interest List Definition

We defined an interest set of 19 bacterial families commonly reported in equine hindgut microbiota literature when we evaluated effect on DNA extraction kit on microbiota profiles.
