# Supplementary material
Source: Research Square preprint supplement (doi:10.21203/rs.3.rs-9093904/v1)
Supplement: Supplementary file 3 [file eefc80f21f780fa3cacfd217.xlsx]

## Sheet: Sheet1
Family	Phylum	Kingdom	Gram status	Oxygen tolerance	Key functional traits	Justification for inclusion	Key references
Acidaminococcaceae	Bacillota (Firmicutes; class Negativicutes)	Bacteria	Gram-	Obligate anaerobe	Amino acid fermentation (e.g., glutamate); succinate, acetate, H2	Amino acid fermenters (succinate/acetate); Gram− lineage within Bacillota; useful Gram-status contrast in extraction kit tests.	Kauter A et al. Anim Microbiome. 2019;1:14.; MBQC Consortium (Sinha R et al.). Nat Biotechnol. 2017;35(11):1077–86.
Anaerolineaceae	Chloroflexota (Chloroflexi)	Bacteria	Gram-	Obligate anaerobe	Filamentous fermenters; syntrophic roles; diverse anaerobic niches	Filamentous anaerobes in Chloroflexota; occur at low abundance in herbivore guts—good sentinels for extraction bias of non-Proteobacteria Gram− taxa.	Dougal K et al. FEMS Microbiol Ecol. 2012;82(3):642–52.; Kauter A et al. Anim Microbiome. 2019;1:14.
Bacteroidaceae	Bacteroidota (syn. Bacteroidetes)	Bacteria	Gram-	Obligate anaerobe	Polysaccharide Utilization Loci (PULs); complex carbohydrate degradation	Core saccharolytic family with PUL-driven carbohydrate degradation; abundant in mammalian hindgut including horses.	Kauter A et al. Anim Microbiome. 2019;1:14.; Costa MC, Weese JS. Anim Health Res Rev. 2012;13(1):121–8.
Christensenellaceae	Bacillota (Firmicutes)	Bacteria	Gram+	Obligate anaerobe	SCFA producers; health-associated; syntrophy with methanogens reported	Host-associated, SCFA-producing Gram+ family; often extraction-sensitive; linked to health-associated enterotypes.	Stewart HL et al. Am J Vet Res. 2018;79(8):811–9.; Kauter A et al. Anim Microbiome. 2019;1:14.
Clostridiaceae	Bacillota (Firmicutes)	Bacteria	Gram+	Obligate anaerobe	Broad fermenters; includes clinically relevant clostridia	Broad anaerobic fermenters; representative Gram+ rods; relevant for assessing lysis efficiency.	Costa MC, Weese JS. Anim Health Res Rev. 2012;13(1):121–8.; Knudsen BE et al. mSystems. 2016;1(5):e00095-16.
Defluviitaleaceae	Bacillota (Firmicutes)	Bacteria	Gram+	Obligate anaerobe	Fermentative anaerobes; some thermophiles (e.g., Defluviitalea)	Gram+ fermenters; robustness benchmark for bead-beating/lysis chemistry comparisons.	Dougal K et al. FEMS Microbiol Ecol. 2012;82(3):642–52.; MBQC Consortium (Sinha R et al.). Nat Biotechnol. 2017;35(11):1077–86.
Eggerthellaceae	Actinomycetota (Actinobacteriota)	Bacteria	Gram+	Obligate anaerobe (mostly)	Aromatic compound & bile acid metabolism; host-associated	High-GC Actinomycetota; bile/phenolic metabolism; extraction-sensitive Gram+ lineage.	Costa MC, Weese JS. Anim Health Res Rev. 2012;13(1):121–8.; Knudsen BE et al. mSystems. 2016;1(5):e00095-16.
Elusimicrobiaceae	Elusimicrobiota	Bacteria	Gram-	Obligate anaerobe	Obligate fermenters; insect/animal gut symbionts; ultramicrobacteria	Low-abundance animal-gut symbionts (Elusimicrobiota); good probes for recovery of rare Gram− taxa.	Dougal K et al. FEMS Microbiol Ecol. 2012;82(3):642–52.; Kauter A et al. Anim Microbiome. 2019;1:14.
Enterobacteriaceae	Pseudomonadota (syn. Proteobacteria)	Bacteria	Gram-	Facultative anaerobe	Versatile metabolism; LPS; includes commensals & pathogens	Facultative Gram− comparators; easy-to-lyse benchmark and potential indicators of contamination or inflammation.	Costa MC, Weese JS. Anim Health Res Rev. 2012;13(1):121–8.; MBQC Consortium (Sinha R et al.). Nat Biotechnol. 2017;35(11):1077–86.
Erysipelotrichaceae	Bacillota (Firmicutes)	Bacteria	Gram+	Obligate anaerobe	Gut-associated fermenters; often host lipid/metabolic associations	Gut-associated Gram+ fermenters; frequently host metabolic associations; extraction-dependent detection.	Stewart HL et al. Am J Vet Res. 2018;79(8):811–9.; MBQC Consortium (Sinha R et al.). Nat Biotechnol. 2017;35(11):1077–86.
Fibrobacteraceae	Fibrobacterota	Bacteria	Gram-	Obligate anaerobe	Specialist cellulolytics (rumen/equine hindgut); succinate/acetate production	Specialist cellulolytics in herbivores (equine/rumen); key fiber degraders to benchmark ecological signal vs. method.	Dougal K et al. FEMS Microbiol Ecol. 2012;82(3):642–52.; Kauter A et al. Anim Microbiome. 2019;1:14.
Lachnospiraceae	Bacillota (Firmicutes)	Bacteria	Gram+	Obligate anaerobe	Fermentation of plant polysaccharides; common butyrate producers	Abundant Gram+ butyrate producers; canonical test for Gram+ lysis performance in stool kits.	Kauter A et al. Anim Microbiome. 2019;1:14.; Knudsen BE et al. mSystems. 2016;1(5):e00095-16.
Lactobacillaceae	Bacillota (Firmicutes)	Bacteria	Gram+	Aerotolerant / facultative anaerobe (strain-dependent)	Lactic acid fermentation; some respiratory growth with heme+menaquinone	Lactic acid bacteria; aerotolerant Gram+; variable recovery across kits; veterinary relevance.	Stewart HL et al. Am J Vet Res. 2018;79(8):811–9.; Costa MC, Weese JS. Anim Health Res Rev. 2012;13(1):121–8.
Methanobacteriaceae	Methanobacteriota (Archaea)	Archaea	Other	Obligate anaerobe	Hydrogenotrophic/methylotrophic methanogenesis; CH4 production	Archaea (methanogens); distinct envelopes; useful controls for extraction chemistry and primer behavior.	Dougal K et al. FEMS Microbiol Ecol. 2012;82(3):642–52.; Kauter A et al. Anim Microbiome. 2019;1:14.
Peptostreptococcaceae	Bacillota (Firmicutes)	Bacteria	Gram+	Obligate anaerobe	Protein/peptide fermentation; fermentative metabolism	Protein/peptide-fermenting Gram+; includes Clostridioides lineage; lysis robustness check.	Costa MC, Weese JS. Anim Health Res Rev. 2012;13(1):121–8.; Knudsen BE et al. mSystems. 2016;1(5):e00095-16.
Pirellulaceae	Planctomycetota	Bacteria	Gram-	Mostly aerobic heterotrophs (some microaerophiles)	Budding division; polysaccharide degradation potential in some genera	Planctomycetes lineage; environmental/background Gram− occasionally detected in feces; method-control sentinel.	Dougal K et al. FEMS Microbiol Ecol. 2012;82(3):642–52.; MBQC Consortium (Sinha R et al.). Nat Biotechnol. 2017;35(11):1077–86.
Prevotellaceae	Bacteroidota (syn. Bacteroidetes)	Bacteria	Gram-	Obligate anaerobe	Plant polysaccharide fermentation; succinate/acetate producers; diet-linked	Diet-responsive saccharolytics; abundant in herbivores; track carbohydrate metabolism signals.	Kauter A et al. Anim Microbiome. 2019;1:14.; Dougal K et al. FEMS Microbiol Ecol. 2012;82(3):642–52.
Ruminococcaceae	Bacillota (Firmicutes)	Bacteria	Gram+	Obligate anaerobe	Fiber/cellulose & hemicellulose degradation; butyrate producers	Gram+ fiber degraders (cellulose/hemicellulose); core equine hindgut taxa; lysis-sensitive.	Kauter A et al. Anim Microbiome. 2019;1:14.; Dougal K et al. FEMS Microbiol Ecol. 2012;82(3):642–52.
Spirochaetaceae	Spirochaetota (Spirochaetes)	Bacteria	Gram-	Anaerobe / facultative (many gut treponemes are strict anaerobes)	Helical motile bacteria; carbohydrate fermentation; some fiber-degrading roles in herbivores	Motile anaerobes (treponemes) in herbivores; contribute to fiber fermentation; often low abundance.	Dougal K et al. FEMS Microbiol Ecol. 2012;82(3):642–52.; Kauter A et al. Anim Microbiome. 2019;1:14.
Veillonellaceae	Bacillota (Firmicutes; class Negativicutes)	Bacteria	Gram-	Obligate anaerobe	Lactate utilizers; propionate producers; Gram-negative cell wall within Bacillota	Gram− cell wall within Bacillota (Negativicutes); lactate utilizers/propionate producers; informative for kit contrasts.	Kauter A et al. Anim Microbiome. 2019;1:14.; Knudsen BE et al. mSystems. 2016;1(5):e00095-16.
